# Supplementary material for: Different Modes of Retrovirus Restriction by Human APOBEC3A and APOBEC3G In Vivo
Source: PubMed Central journal article supplement (PMC4031197; doi:10.1371/journal.ppat.1004145), 2014-05-22
Supplement: ppat.1004145.s001.pdf [file ppat.1004145.s001.pdf]

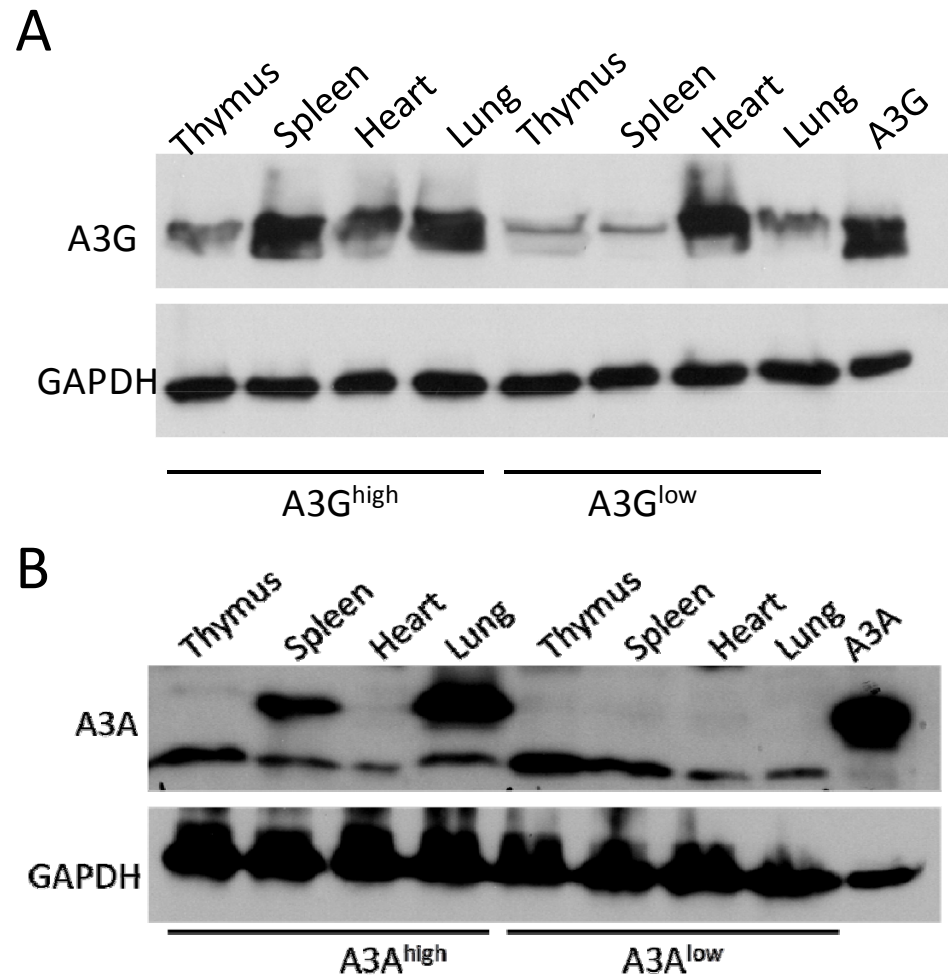

**Figure S1.** A) Western blots of tissues from A3G<sup>high</sup> and A3G<sup>low</sup> strains, probed with anti-A3G and anti-GAPDH antibodies. B) Western blots of tissues from A3A<sup>high</sup> and A3A<sup>low</sup> strains, probed with anti-A3G antibody that also recognizes A3A (cem15 C-29) and anti-GAPDH antibodies. The mice used in this analysis were uninfected.
