# Supplementary material for: Different Modes of Retrovirus Restriction by Human APOBEC3A and APOBEC3G In Vivo
Source: PubMed Central journal article supplement (PMC4031197; doi:10.1371/journal.ppat.1004145), 2014-05-22
Supplement: ppat.1004145.s003.pdf [file ppat.1004145.s003.pdf]

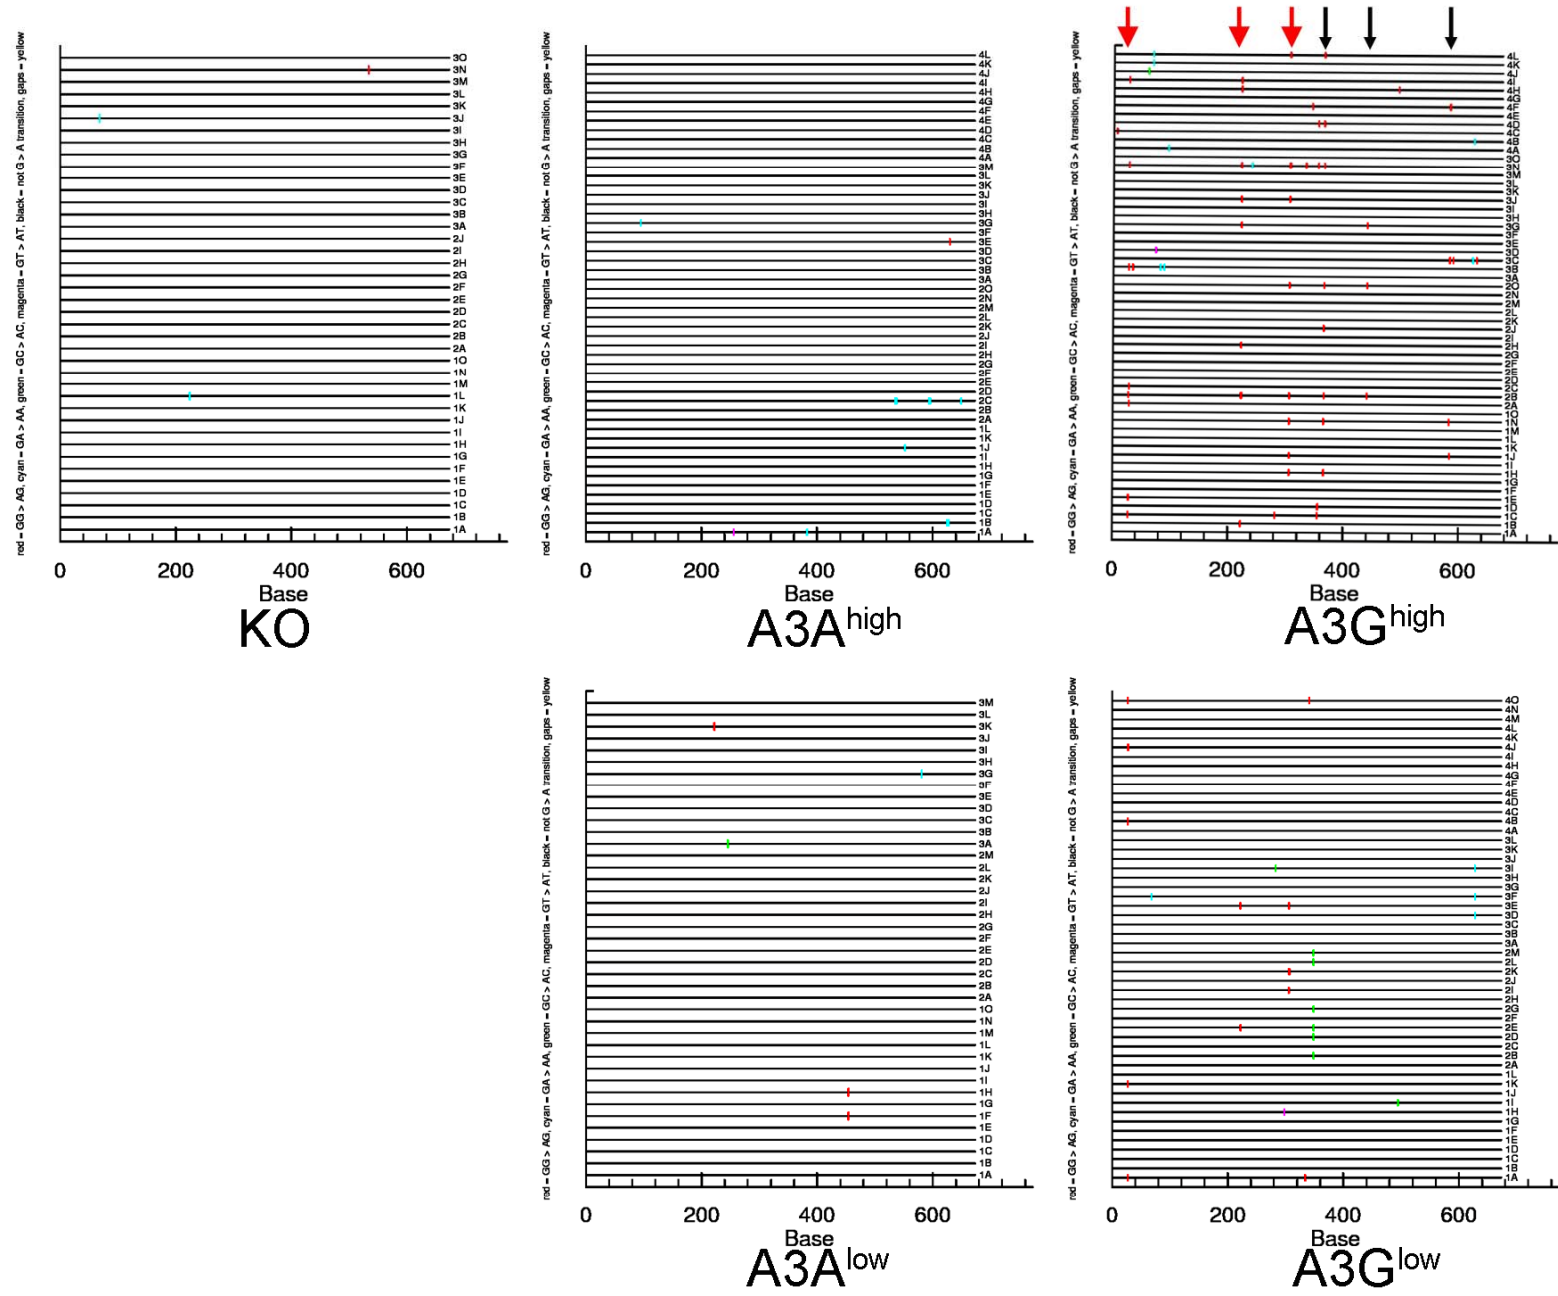

**Figure S3.** Deamination of MMTV viral DNA in A3A and A3G transgenic mice.
